# Supplementary material for: Bacterial concentration and Campylobacter spp. quantification differ when fresh or ultra-frozen samples are analysed over time using molecular biology and culture-based methods
Source: PLoS One. 2022 Sep 16;17(9):e0274682. doi: 10.1371/journal.pone.0274682 (PMC9481049; doi:10.1371/journal.pone.0274682)
Supplement: S1 Data — (XLSX) [file pone.0274682.s001.xlsx]

## Sheet: Data
	Log10 Bacteria/g trhough the different techniques and targets at all the experimental time points
					Analytical method
					CFU enumeration	qPCR
	Date	Day	SampleID	Pen	Campylobacter spp.	C. jejuni	Campylobacter spp.	Total bacteria (16S rRNA, V3 region)
	2020-10-20	0	T0.1	1	7.07918	7.88102	8.82519	9.90692
	2020-10-20	0	T0.2	2	7.53148	7.84092	8.8464	9.89607
	2020-10-20	0	T0.3	3	7.65321	7.96178	8.83944	9.98814
	2020-10-20	0	T0.4	4	7.5682	7.36117	8.21763	9.82071
	2020-10-20	0	T0.5	5	7.14613	7.45287	8.19174	9.98896
	2020-10-20	0	T0.6	6	7.89763	7.90492	8.62111	9.78631
	2020-10-23	3	T1.1	1	3.6902	7.80698	8.61831	9.83212
	2020-10-23	3	T1.2	2	3.716	7.27253	8.46357	9.8598
	2020-10-23	3	T1.3	3	3.27875	7.57053	8.41745	9.72668
	2020-10-23	3	T1.4	4	3.87018	7.04215	8.04263	9.79208
	2020-10-23	3	T1.5	5	3.4624	7.31407	8.32933	9.82081
	2020-10-23	3	T1.6	6	3.27875	7.85256	8.7318	9.86267
	2020-10-27	7	T2.1	1	3.32024	7.98198	8.85853	9.95157
	2020-10-27	7	T2.2	2	3.58747	7.9426	8.86955	10.0725
	2020-10-27	7	T2.3	3	3.16007	7.89987	8.60339	9.9441
	2020-10-27	7	T2.4	4	3.48932	7.01444	7.82222	9.78988
	2020-10-27	7	T2.5	5	2.62764	7.35707	8.22413	9.922
	2020-10-27	7	T2.6	6	2.95154	7.65664	8.63	9.87595
	2020-11-02	14	T3.1	1	3.67259	8.22597	8.76475	10.0489
	2020-11-02	14	T3.2	2	3.7542	8.26831	8.84693	10.1327
	2020-11-02	14	T3.3	3	3.04019	8.15993	8.65841	9.94178
	2020-11-02	14	T3.4	4	3.36173	7.69743	8.20084	9.96544
	2020-11-02	14	T3.5	5	3.16111	7.70211	8.18211	10.0727
	2020-11-02	14	T3.6	6	3.12307	8.12644	8.7085	10.0372
	2020-11-17	28	T4.1	1	3.12764	8.59603	8.86159	10.0865
	2020-11-17	28	T4.2	2	3.22358	8.08927	8.66948	10.0891
	2020-11-17	28	T4.3	3	2.30103	8.2493	8.6751	9.98848
	2020-11-17	28	T4.4	4	3.22708	7.67579	8.0584	9.85855
	2020-11-17	28	T4.5	5	3.05697	7.92762	8.21379	10.0558
	2020-11-17	28	T4.6	6	2.62764	8.28637	8.57586	10.0568
	2020-12-21	62	T5.1	1	3.29532	8.01915	8.48638	9.86795
	2020-12-21	62	T5.2	2	3.64937	8.36428	8.70019	10.055
	2020-12-21	62	T5.3	3	3.08143	8.2946	8.56186	10.0648
	2020-12-21	62	T5.4	4	3.3165	7.47563	7.97192	9.92055
	2020-12-21	62	T5.5	5	2.15051	7.62313	7.98588	9.94399
	2020-12-21	62	T5.6	6	2.886	8.04144	8.39291	9.90088
